# Supplementary material for: Physiological Evaluation of Anomalous Aortic Origin of a Coronary Artery Using Computed Tomography–Derived Fractional Flow Reserve
Source: PubMed Central journal article supplement — J Am Heart Assoc. 2021 Mar 17;10(7):e018593. doi: 10.1161/JAHA.120.018593 (PMC8174353; doi:10.1161/jaha.120.018593), 2021-03-17
Supplement: JAH3-10-e018593-s001.pdf [file JAH3-10-e018593-s001.pdf]

# **SUPPLEMENTAL MATERIAL**

Figure S1. Frequency distribution of ANOCOR vessel and non-ANOCOR vessel in at risk group.

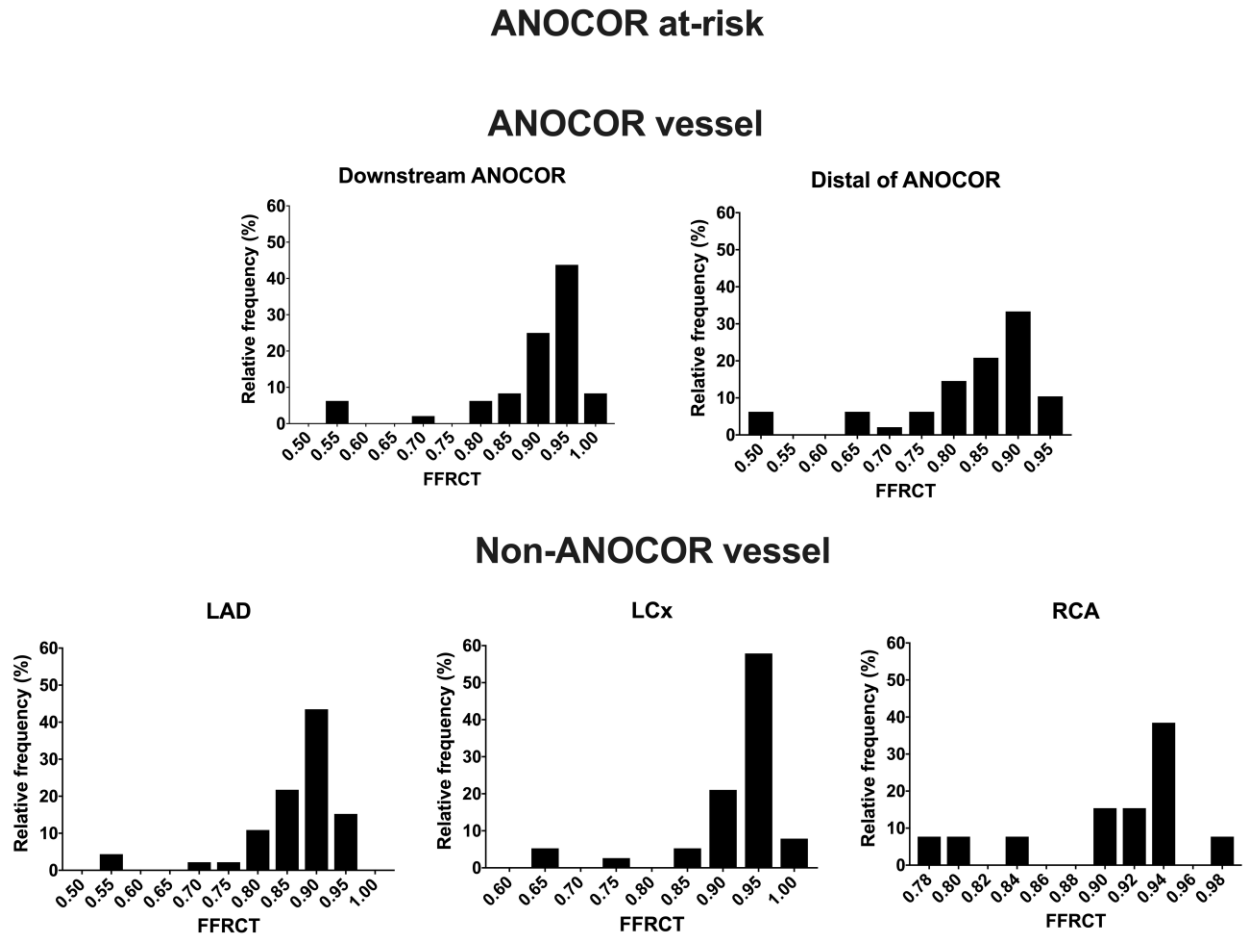

ANOCOR: Anomalous aortic origin of a coronary artery, FFRCT: Fractional Flow Reserve derived from Computed Tomography, LAD: Left Anterior Descending, LCx: Left Circumflex, RCA: Right Coronary Artery.

Figure S2. Frequency distribution of ANOCOR vessel and non-ANOCOR vessel in non-at-risk group.

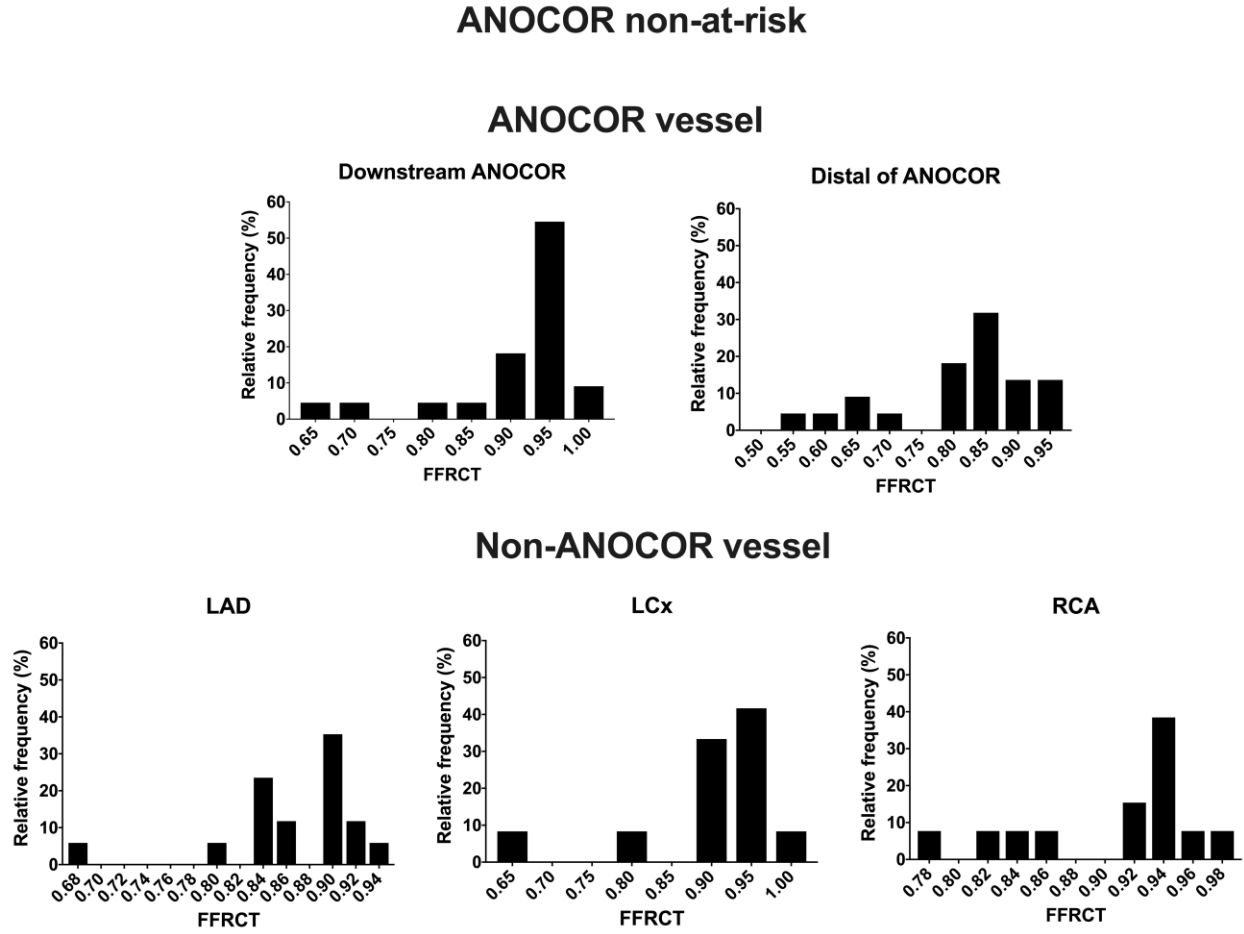

ANOCOR: Anomalous aortic origin of a coronary artery, FFRCT: Fractional Flow Reserve derived from Computed Tomography, LAD: Left Anterior Descending, LCx: Left Circumflex, RCA: Right Coronary Artery.
